# Supplementary material
Source: HighWire-hosted journal article supplement (https://erj.ersjournals.com/content/55/6/1901228)
Supplement: inline-supplementary-material-1 [file inline-supplementary-material-1.pdf]

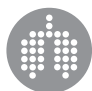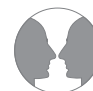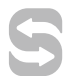

SHAREABLE PDF

# No indication of insulin resistance in idiopathic pulmonary arterial hypertension with preserved physical activity

Bence M. Nagy<sup>1</sup>, Gabor Kovacs<sup>1,2</sup>, Adrienn Tornyos<sup>1,3</sup>, Eva Svehlikova<sup>4</sup>, Vasile Foris<sup>1,2</sup>, Chandran Nagaraj<sup>1</sup>, Grazyna Kwapiszewska<sup>1,5</sup>, Thomas R. Pieber<sup>4</sup>, Andrea Olschewski<sup>1,6</sup> and Horst Olschewski<sup>1,2</sup>

**Affiliations:** <sup>1</sup>Ludwig Boltzmann Institute for Lung Vascular Research, Graz, Austria. <sup>2</sup>Division of Pulmonology, Dept of Internal Medicine, Medical University of Graz, Graz, Austria. <sup>3</sup>Division of General Radiology, Dept of Radiology, Medical University of Graz, Graz, Austria. <sup>4</sup>Division of Endocrinology and Diabetology, Dept of Internal Medicine, Medical University of Graz, Graz, Austria. <sup>5</sup>Otto Loewi Center, Medical University of Graz, Graz, Austria. <sup>6</sup>Division of Special Anaesthesiology, Pain and Intensive Care Medicine, Dept of Anaesthesiology and Intensive Care Medicine, Medical University of Graz, Graz, Austria.

**Correspondence:** Bence M. Nagy, Ludwig Boltzmann Institute, Lung Vascular Research, Neue Stiftingtalstrasse 6, Graz A-8010, Austria. E-mail: bence.nagy@lvr.lbg.ac.at

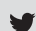

@ERSpublications

**Insulin resistance might not be a primary cause of severe remodelling of the small pulmonary arteries in idiopathic PAH** <http://bit.ly/3c8elot>

**Cite this article as:** Nagy BM, Kovacs G, Tornyos A, *et al.* No indication of insulin resistance in idiopathic pulmonary arterial hypertension with preserved physical activity. *Eur Respir J* 2020; 55: 1901228 [<https://doi.org/10.1183/13993003.01228-2019>].

This single-page version can be shared freely online.

## To the Editor:

There is growing interest in metabolic profiling in pulmonary arterial hypertension (PAH) due to current findings suggesting significant metabolic changes causing pulmonary arterial remodelling and linking PAH to insulin resistance [1]. Such findings may have major impact on future diagnostic and therapeutic strategies for PAH. However, most studies have enrolled patients with severe disease whose reduced physical activity may have a profound effect on insulin sensitivity.
